# Supplementary material
Source: PubMed Central journal article supplement (PMC3003438)

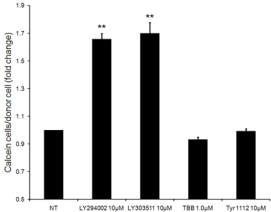

Supplement: NIHMS247141-supplement-10.pdf [file NIHMS247141-supplement-10.pdf]

**A**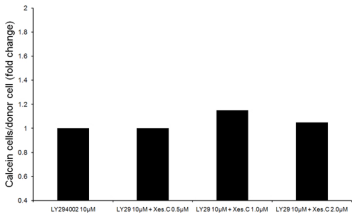**B**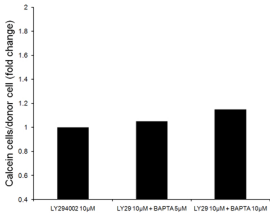

Supplement: NIHMS247141-supplement-11.pdf [file NIHMS247141-supplement-11.pdf]

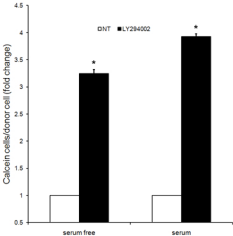

Supplement: NIHMS247141-supplement-8.pdf [file NIHMS247141-supplement-8.pdf]

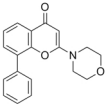

LY294002

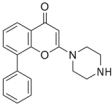

LY303511

Supplement: NIHMS247141-supplement-9.pdf [file NIHMS247141-supplement-9.pdf]
